# Supplementary material for: Administration of Secretome Derived from Human Mesenchymal Stem Cells Induces Hepatoprotective Effects in Models of Idiosyncratic Drug-Induced Liver Injury Caused by Amiodarone or Tamoxifen
Source: MDPI journal article supplement (doi:10.3390/cells12040636), 2023-02-16
Supplement: s1 [file s1]

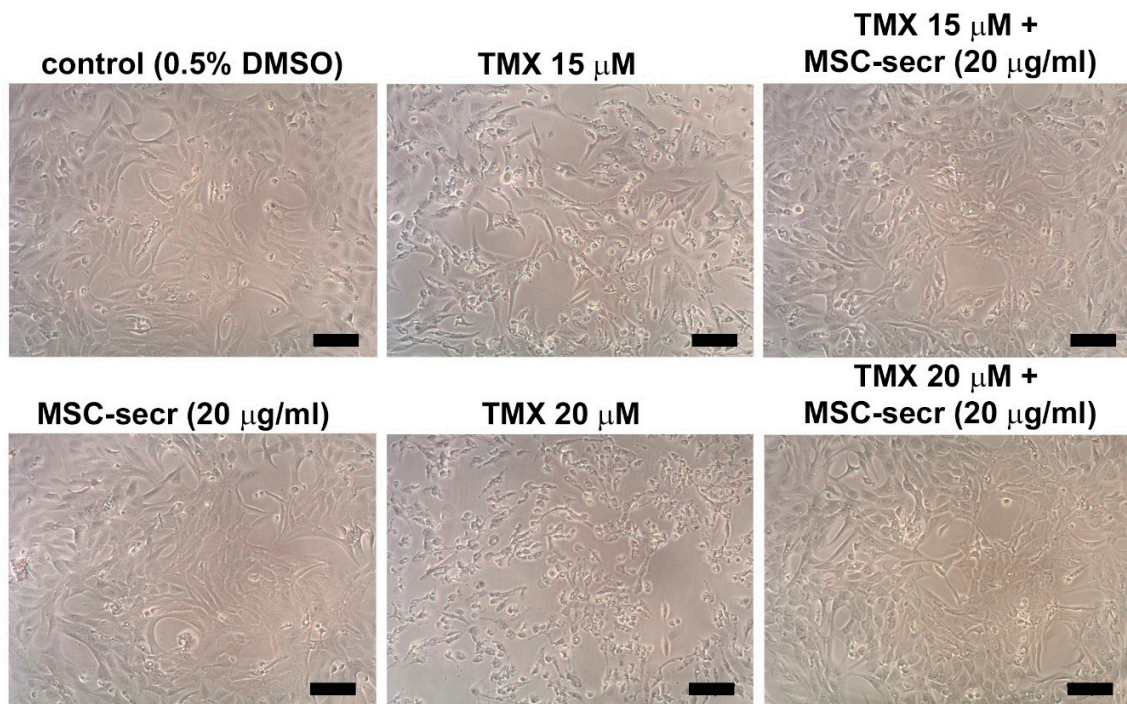

**Figure S6: MSC secretome presented a cytoprotective effect in HepaRG cells incubated with TMX.** Optical microscopic observation of the cytoprotective effect of MSC secretome on HepaRG cells exposed to TMX (15 and 20 μM), alone or coincubated with MSC secretome (20 μg/ml) for 24 hours. As control group, cells were incubated with the drug solvent (0.5% DMSO). Representative micrograph of three independent experiments. Bars represent 100μm.
