# Supplementary material for: Administration of Secretome Derived from Human Mesenchymal Stem Cells Induces Hepatoprotective Effects in Models of Idiosyncratic Drug-Induced Liver Injury Caused by Amiodarone or Tamoxifen
Source: MDPI journal article supplement (doi:10.3390/cells12040636), 2023-02-16
Supplement: s1 [file s1]

**Table S1. RT-qPCR specific primers and characteristics of amplicons.**

| Gene                                | N° GenBank access | Sense (5'→3')          | Antisense (5'→3')      | Amplicon  |         |
|-------------------------------------|-------------------|------------------------|------------------------|-----------|---------|
|                                     |                   |                        |                        | size (bp) | Tm (°C) |
| <i>human TNF-α</i>                  | NM_000594.4       | GAGGCCAAGCCCTGGTATG    | CGGGCCGATTGATCTCAGC    | 91        | 81      |
| <i>human IL-6</i>                   | NM_001371096      | CCAGAGCTGTGCAGATGAGT   | AGCTGCGCAGAATGAGATGA   | 174       | 80      |
| <i>human iNOS</i>                   | NM_000625.4       | TTCAGTATCACAACTCAGCAAG | TGGACCTGCAAGTTAAAATCCC | 207       | 81      |
| <i>human CYP1A1</i>                 | NM_000499.5       | TCGGCCACGGAGTTTCTTC    | GGTCAGCATGTGCCCAATCA   | 141       | 82      |
| <i>human CYP1A2</i>                 | NM_000761.5       | CTGGGCACTTCGACCCTTAC   | TCTCATCGCTACTCTCAGGGA  | 99        | 79      |
| <i>human CYP2B6</i>                 | NM_000767.5       | TTCACGGTACACCTGGGAC    | ATCACACCATATCCCCGGAAG  | 146       | 83      |
| <i>human CYP2C9</i>                 | NM_000771.4       | CCTCTGGGGCATTATCCATC   | ATATTTGCACAGTGAAACAT   | 137       | 75      |
| <i>human CYP2C19</i>                | NM_000769.4       | GGAAAACGGATTTGTGTGGGA  | GGTCCTTTGGGTCAATCAGA   | 109       | 76      |
| <i>human CYP2D6</i>                 | NM_001025161.3    | ACCAGGCTCACATGCCCTA    | TTCGATGTCACGGGATGTCAT  | 104       | 81      |
| <i>human CYP2E1</i>                 | NM_000773.4       | ATGTCTGCCCTCGGAGTCA    | CGATGATGGGAAGCGGGAAA   | 127       | 85      |
| <i>human CYP3A4</i>                 | NM_001202855.3    | AAGTCGCCTCGAAGATACACA  | AAGGAGAGAACACTGCTCGTG  | 174       | 77      |
| <i>human CYP7A1</i>                 | NM_000780.4       | GCAATTTGGTGCCAATCCTCT  | GCACAACACCTTATGGTATG   | 133       | 74      |
| <i>human Ribosomal protein L13a</i> | NM_001270491.2    | CGTGCGTCTGAAGCCTACAA   | TGTCACTGCCTGGTACTTCC   | 82        | 79      |
| <i>human GADPH</i>                  | NM_001357943.2    | CTGGGCTACACTGAGCACC    | AAGTGGTCGTTGAGGGCAATG  | 101       | 81      |
| <i>mouse GADPH</i>                  | XM_001474390      | ACTCCACTCACGGCAAATTC   | TCTCCATGGTGGTGAAGACA   | 171       | 88      |
| <i>mouse α-smooth muscle actin</i>  | NM_007392         | TCAATGTCCCCGCCATGTATGT | AAGGAATAGCCACGCTCAGTCA | 220       | 89      |
