# Supplementary material for: Administration of Secretome Derived from Human Mesenchymal Stem Cells Induces Hepatoprotective Effects in Models of Idiosyncratic Drug-Induced Liver Injury Caused by Amiodarone or Tamoxifen
Source: MDPI journal article supplement (doi:10.3390/cells12040636), 2023-02-16
Supplement: s1 [file s1]

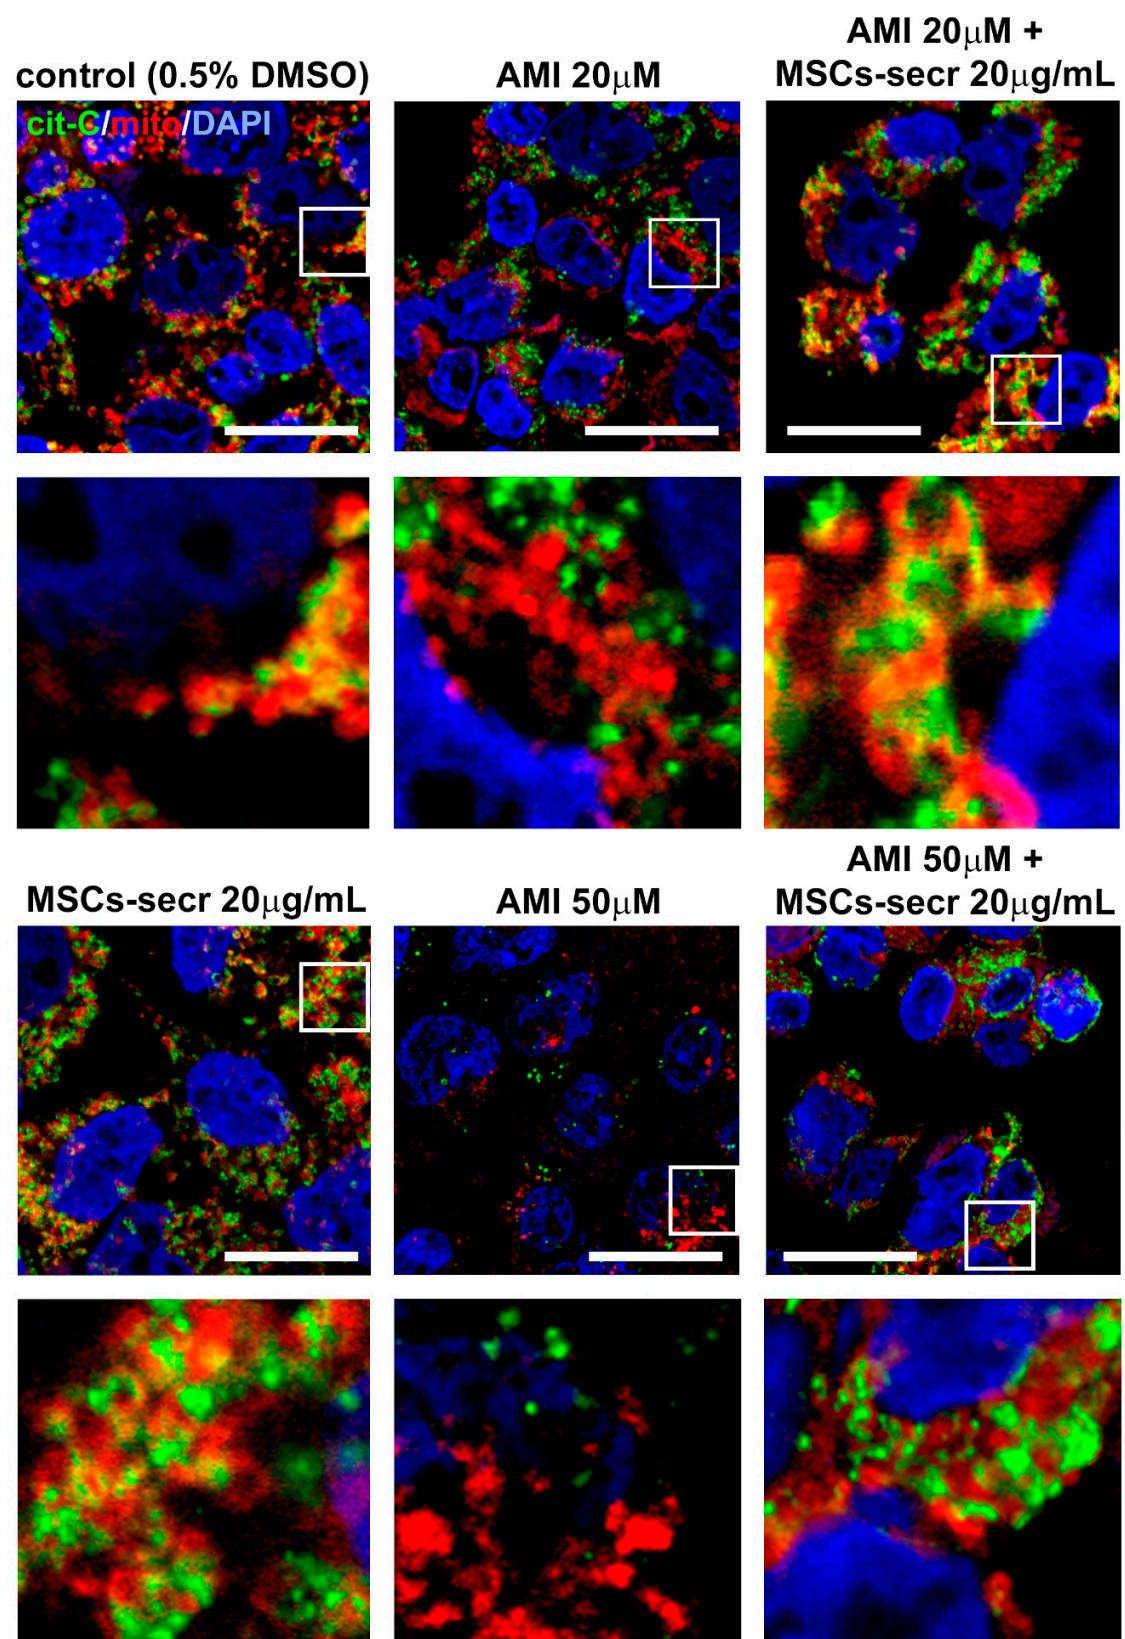

**Figure S4: Coincubation with MSC secretome prevented cytochrome C release in HepG2 cells exposed to AMI or TMX.** The mitochondrial release of cytochrome C was evaluated by immunofluorescence in HepG2 cells exposed to AMI or TMX alone or coincubated with MSC secretome (20µg/ml) for 24 hours (please see Figure 3). Representative micrographs of mitochondria (MitoTracker, red), cytochrome C (Cyt C, green), and their colocalization (merge, yellow); nuclei were counterstained with DAPI (blue). Cells with drug solvent (0.5% DMSO) was used as control group and showed maximal colocalization. At the bottom of each image a magnification of each insert represented by the white rectangle is shown. Scale bars represent 20µm.
