# Supplementary material for: Administration of Secretome Derived from Human Mesenchymal Stem Cells Induces Hepatoprotective Effects in Models of Idiosyncratic Drug-Induced Liver Injury Caused by Amiodarone or Tamoxifen
Source: MDPI journal article supplement (doi:10.3390/cells12040636), 2023-02-16
Supplement: s1 [file s1]

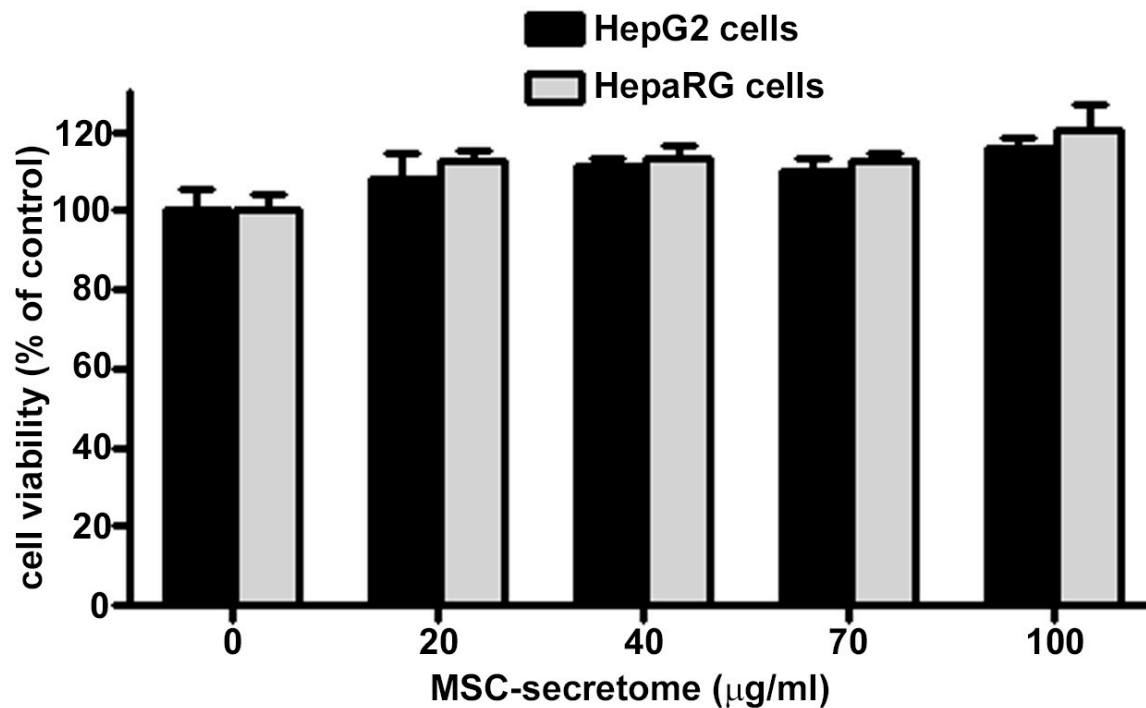

**Figure S1: Effect of MSC secretome on liver cells viability.** HepG2 and HepaRG cells were incubated with different concentrations of MSC secretome (from 20 to 100 μg/ml) and a viability MTT assay was performed 24 hours later. Cell viability was normalized against the secretome vehicle (PBS) control group and expressed as percentage. Data are presented as means ± SEM (n=3) of three independent experiments.
