# Supplementary material for: Administration of Secretome Derived from Human Mesenchymal Stem Cells Induces Hepatoprotective Effects in Models of Idiosyncratic Drug-Induced Liver Injury Caused by Amiodarone or Tamoxifen
Source: MDPI journal article supplement (doi:10.3390/cells12040636), 2023-02-16
Supplement: s1 [file s1]

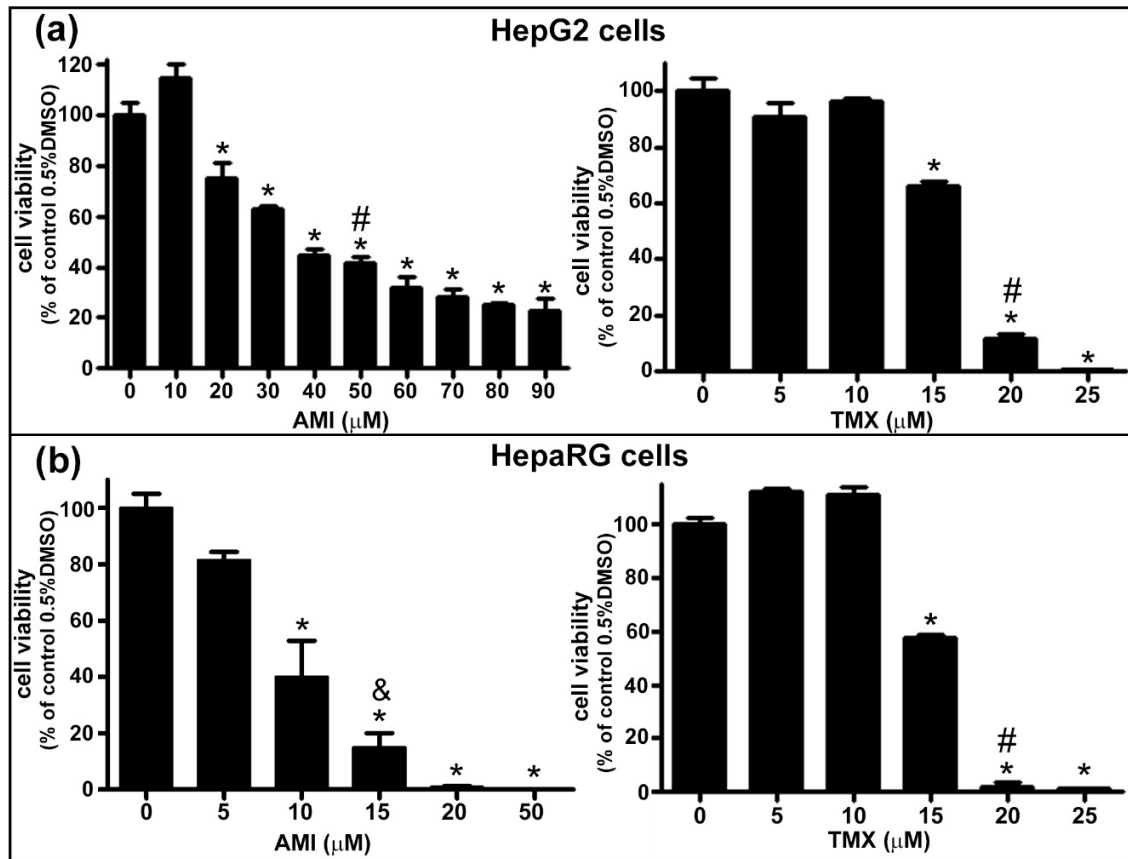

**Figure S2: Cytotoxicity of amiodarone (AMI) or tamoxifen (TMX) in HepG2 and HepaRG cells.**

The cytotoxicity of AMI and TMX in **(a)** HepG2 and **(b)** HepaRG cells was evaluated. Both cell lines were treated with AMI or TMX at the indicated concentrations for 24 hours. As a control group, cells were incubated with drug solvent alone (0.5% DMSO). Cell viability was measured by an MTT assay at the end of the treatment, and control group values were taken as 100%. Data are presented as means  $\pm$  SEM (n=3) of three independent experiments. \*:  $p < 0.05$  vs. control (0.5% DMSO); #:  $p < 0.05$  vs. TMX (15  $\mu$ M); &:  $p < 0.05$  vs. AMI (10  $\mu$ M).
