# Supplementary material for: Administration of Secretome Derived from Human Mesenchymal Stem Cells Induces Hepatoprotective Effects in Models of Idiosyncratic Drug-Induced Liver Injury Caused by Amiodarone or Tamoxifen
Source: MDPI journal article supplement (doi:10.3390/cells12040636), 2023-02-16
Supplement: s1 [file s1]

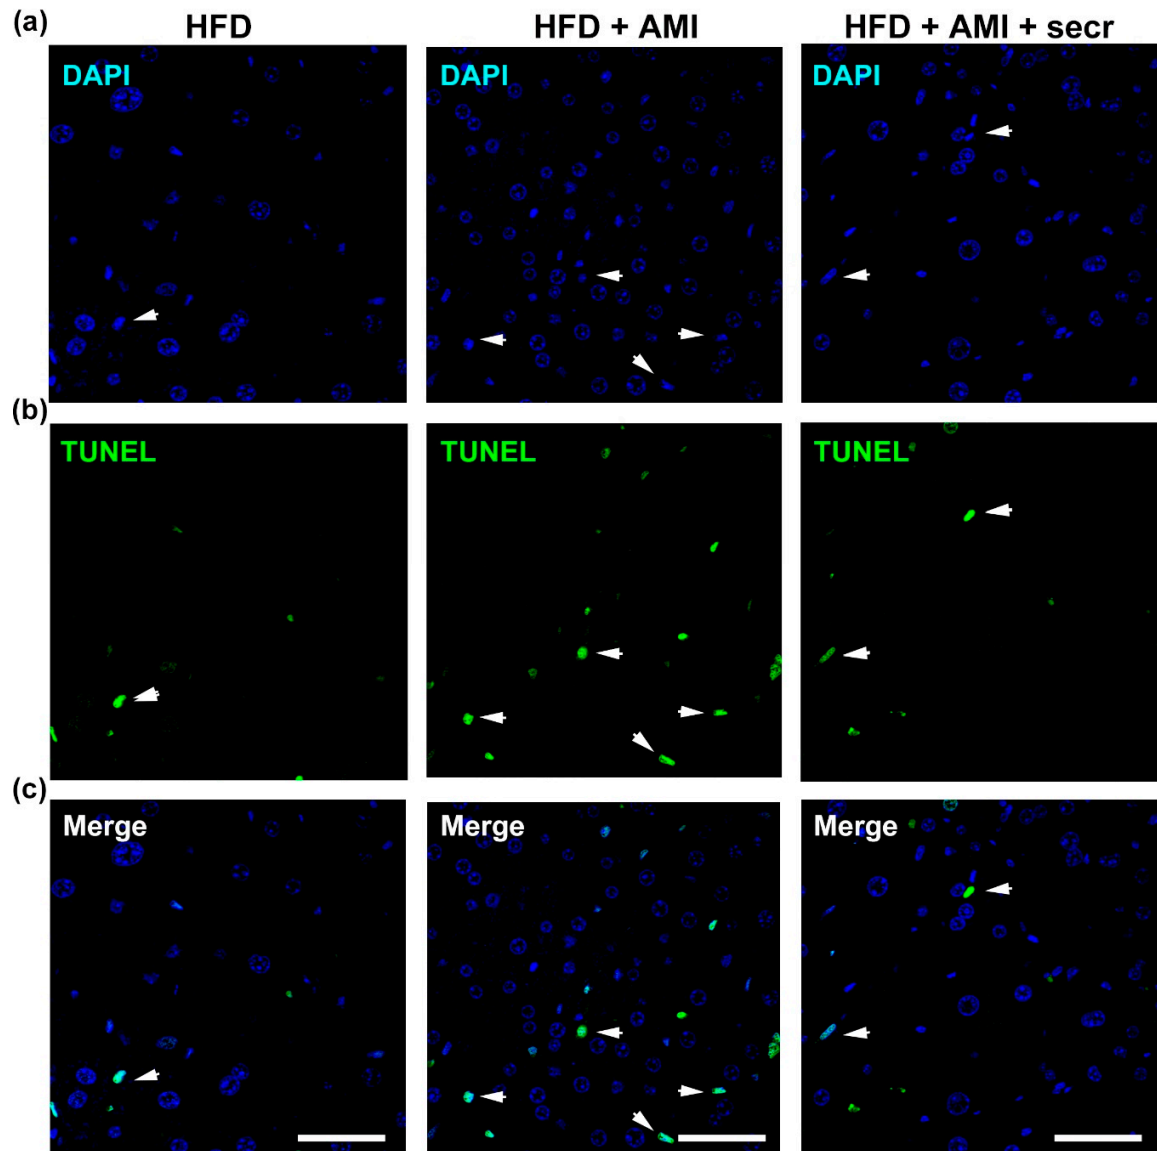

**Figure 12. MSC secretome administration inhibited apoptosis of hepatic cells after chronic exposure to AMI.** Male mice were fed a high fat diet (HFD) for 34 weeks and divided into three groups. During the last four weeks, one group did not receive additional treatment (HFD group), while a second group was treated daily with AMI (40 mg/kg) (HFD+AMI). The third group received MSC secretome endovenously once a week (HFD+AMI+secr). Cell apoptosis was analyzed in all experimental groups 24 hours after the last administration of AMI (Figure 8). **(a)** The nuclei were stained with DAPI (blue), **(b)** while the effect of MSC secretome on cell apoptosis was determined by TUNEL staining (FITC, green). **(c)** colocalization of both stains. Arrows indicate TUNEL (+) nuclei. Scale bars represent 50  $\mu\text{m}$ .
