# Supplementary material for: Administration of Secretome Derived from Human Mesenchymal Stem Cells Induces Hepatoprotective Effects in Models of Idiosyncratic Drug-Induced Liver Injury Caused by Amiodarone or Tamoxifen
Source: MDPI journal article supplement (doi:10.3390/cells12040636), 2023-02-16
Supplement: s1 [file s1]

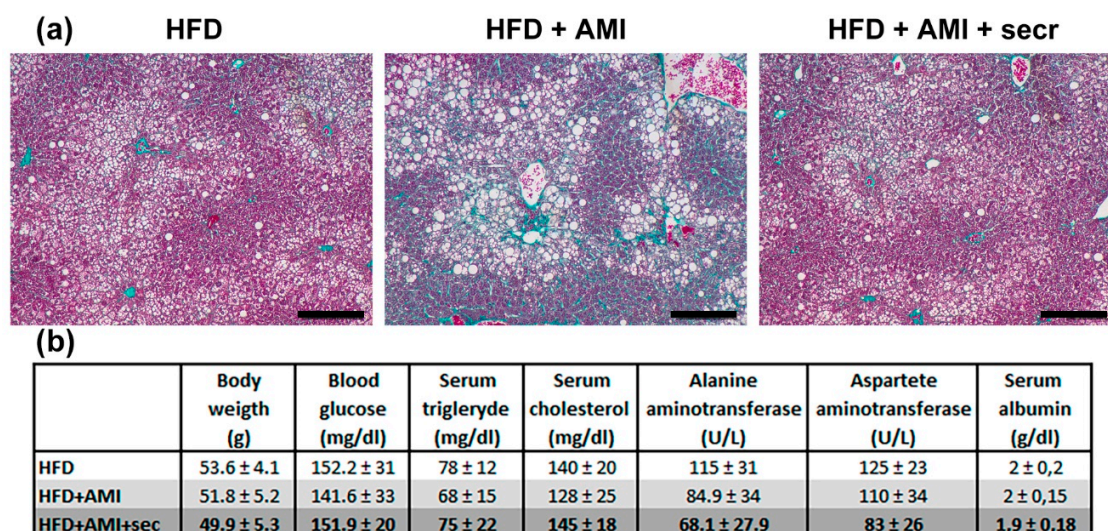

**Figure S9: evaluation of liver fibrosis and biochemical profile in obese mice treated with AMI alone or AMI plus MSC secretome.**

Male mice were fed a high-fat diet (HFD) for 30 weeks and were divided into three groups. The first group was treated with a weekly *i.p.* administration of saline solution (HFD group) for four weeks while the other two groups were treated daily with AMI (40 mg/kg), *i.p.*, for four weeks. At the end of each week, the second and third groups received by the tail vein 200  $\mu$ l of saline solution (HFD+AMI group) or 200  $\mu$ l of MSC secretome (HFD+AMI+secr) respectively. All mice were sacrificed 72 hours after the last treatment administration. **(a)** Representative photographs of liver sections with Masson's trichrome to evaluate collagen fibers deposition. Scale bars represents 200  $\mu$ m. **(b)** Results of biochemical analyses performed on plasma are shown for each experimental group (n=8).
