# Supplementary material for: Administration of Secretome Derived from Human Mesenchymal Stem Cells Induces Hepatoprotective Effects in Models of Idiosyncratic Drug-Induced Liver Injury Caused by Amiodarone or Tamoxifen
Source: MDPI journal article supplement (doi:10.3390/cells12040636), 2023-02-16
Supplement: s1 [file s1]

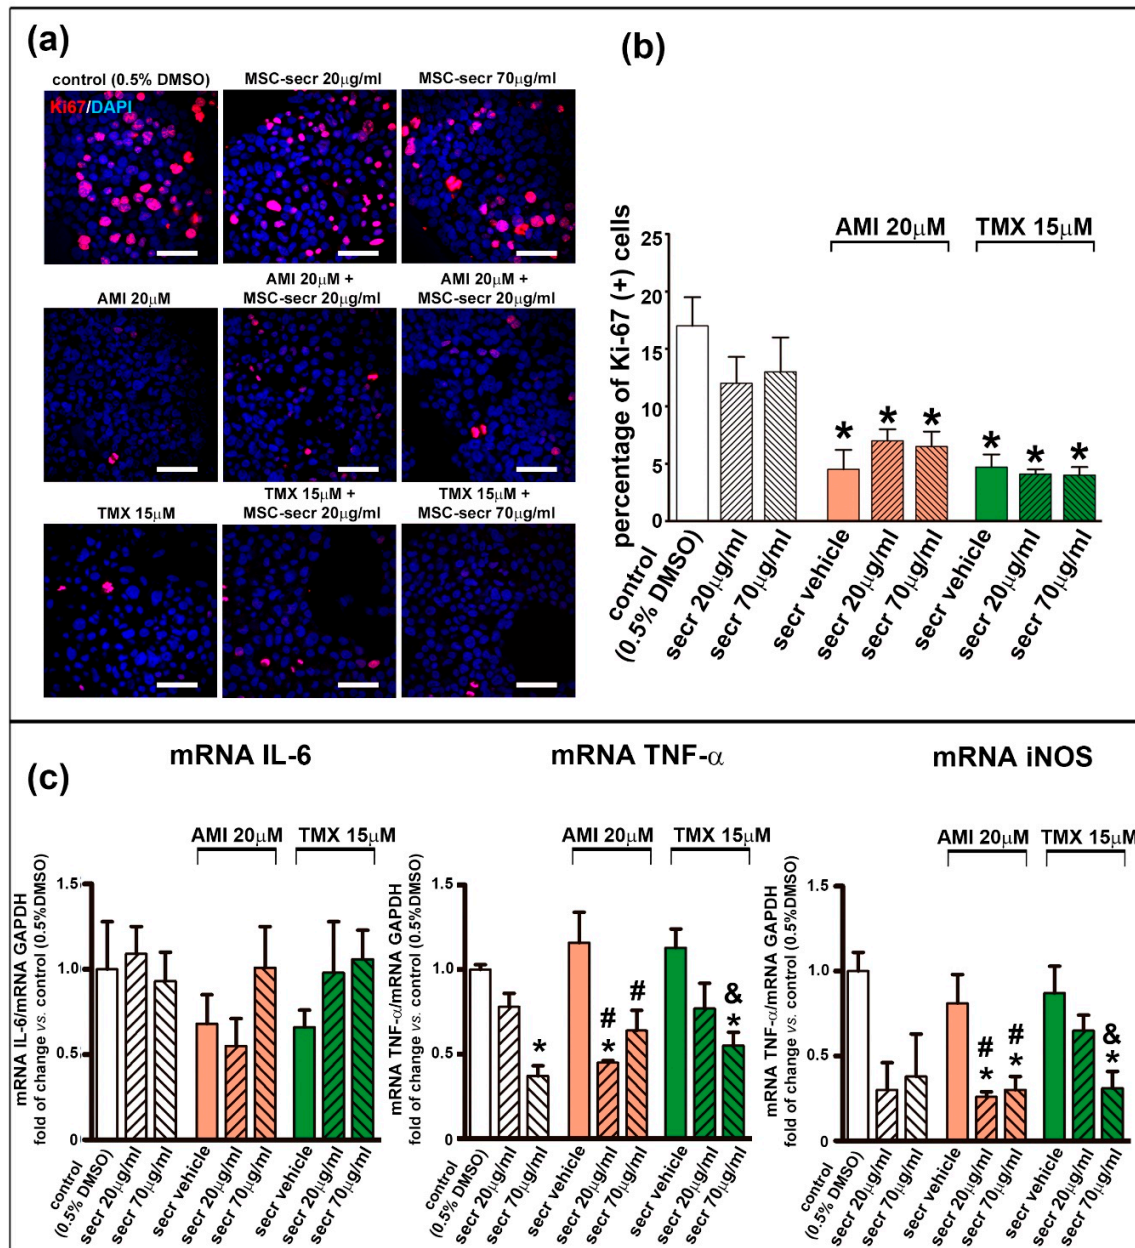

**Figure S7: Coincubation with MSC secretome not change HepG2 proliferation rate after exposure to AMI or TMX.** Cell proliferation was evaluated in HepG2 cells exposed to AMI or TMX alone or coincubated with two concentrations of MSC secretome (20 and 70 µg/ml) for 24 hours. As control group, cells were incubated with the drug solvent (0.5% DMSO). Ki-67 immunoreactivity (Alexa Fluor 555, red) was evaluated by immunofluorescence. Nuclei were counterstained with DAPI (blue). **(a)** Representative micrographs of HepG2 cells in each experimental condition. Scale bars represent 50µm. **(b)** Quantification of Ki-67 positive nuclei was done by digital image analysis. All data are presented as means ± SEM of Ki-67-positive nuclei per 100 hepatocytes in 20 high-power fields per slides and three replicates per experimental group. **(c)** Expression of

key factors of proliferative response after 24 hours of treatment, was evaluated by RT-qPCR, normalized against GAPDH and expressed as fold of change vs. control group (0.5% DMSO).

Data are presented as means  $\pm$  SEM (n=4) of three independent experiments. \*p<0.05 vs. control group (0.5% DMSO); #p<0.05 vs. AMI plus secretome vehicle, of the same experimental group (same AMI concentration); &p<0.05 vs. TMX plus secretome vehicle, of the same experimental group (same TMX concentration). **secr vehicle:** MSC secretome vehicle (PBS); **secr:** MSC secretome; **AMI:** amiodarone; **TMX:** tamoxifen.
