# Supplementary material for: Administration of Secretome Derived from Human Mesenchymal Stem Cells Induces Hepatoprotective Effects in Models of Idiosyncratic Drug-Induced Liver Injury Caused by Amiodarone or Tamoxifen
Source: MDPI journal article supplement (doi:10.3390/cells12040636), 2023-02-16
Supplement: s1 [file s1]

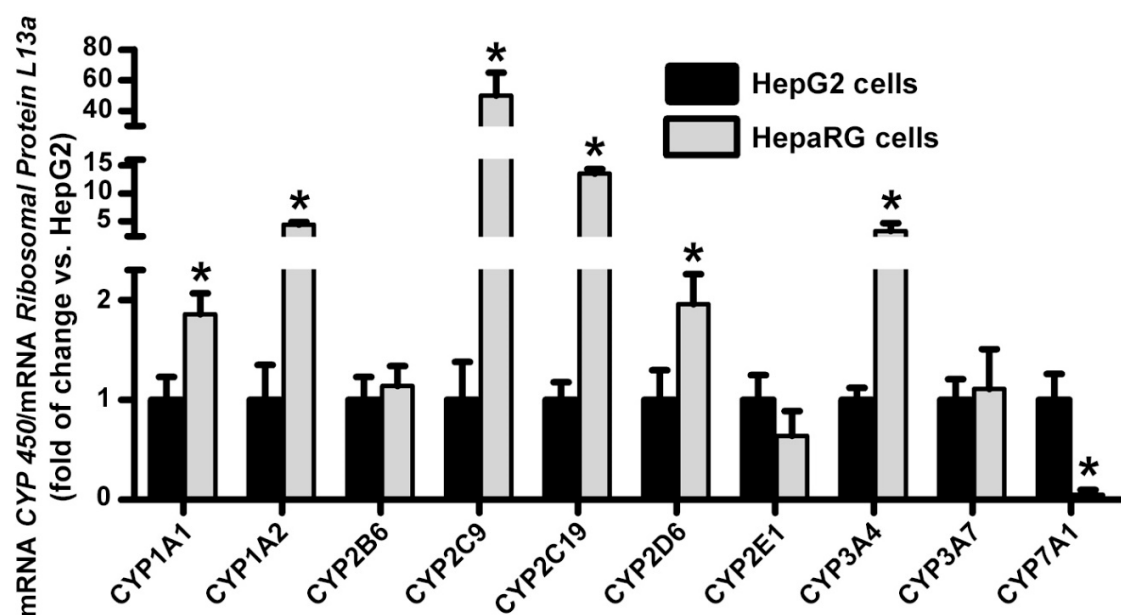

**Figure S3: Cytochrome P450 mRNA levels in HepG2 and HepaRG cells.**

CYP450 mRNA levels were measured by RT-qPCR in both HepG2 and HepaRG cell lines. The expression of CYP genes were normalized against that of the RPL13a gene and expressed as fold of change vs. that of HepG2 cells. All data are presented as means  $\pm$  SEM (n=4). \*:  $p < 0.05$  vs. HepG2 cells.
