# Supplementary material for: Administration of Secretome Derived from Human Mesenchymal Stem Cells Induces Hepatoprotective Effects in Models of Idiosyncratic Drug-Induced Liver Injury Caused by Amiodarone or Tamoxifen
Source: MDPI journal article supplement (doi:10.3390/cells12040636), 2023-02-16
Supplement: s1 [file s1]

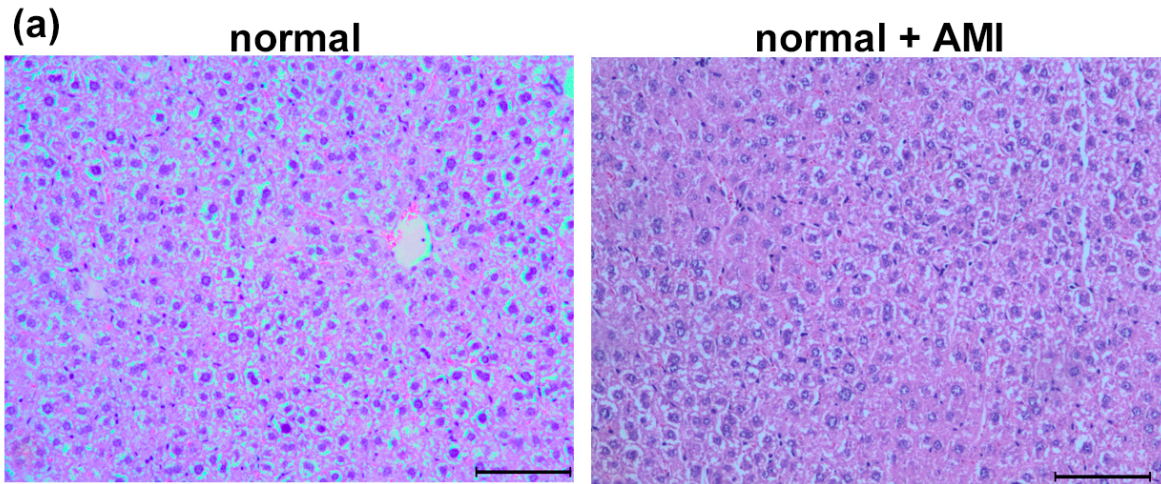

(b)

|              | Body<br>weighth<br>(g) | Blood<br>glucose<br>(mg/dl) | Serum<br>trigleryde<br>(mg/dl) | Serum<br>cholesterol<br>(mg/dl) | Alanine<br>aminotransferase<br>(U/L) | Aspartete<br>aminotransferase<br>(U/L) |
|--------------|------------------------|-----------------------------|--------------------------------|---------------------------------|--------------------------------------|----------------------------------------|
| normal       | 26.8 ± 0.8             | 120 ± 25                    | 52 ± 22                        | 63 ± 10                         | 32.0 ± 10.5                          | 120 ± 30                               |
| normal + AMI | 25.7 ± 1.5             | 110 ± 35                    | 55 ± 19                        | 70 ± 15                         | 30.3 ± 13.8                          | 139 ± 45                               |

**Figure S8: Histological and biochemical characterization of normal mice treated with AMI.**

Male mice fed on a regular diet were treated daily with saline solution (normal group) or AMI (40 mg/kg) (normal + AMI), for four weeks. **(a)** Representative micrographs of liver sections stained with hematoxylin and eosin are shown. Scale bars represent 100  $\mu$ m. **(b)** Biochemical examination of plasma from each experimental group (n=8).
