# Supplementary material for: Administration of Secretome Derived from Human Mesenchymal Stem Cells Induces Hepatoprotective Effects in Models of Idiosyncratic Drug-Induced Liver Injury Caused by Amiodarone or Tamoxifen
Source: Cells. 2023 Feb 16;12(4):636. doi: 10.3390/cells12040636 (PMC9954258; doi:10.3390/cells12040636)
Supplement: Supplementary file 1 [file cells-12-00636-s001.zip › Table S2 List of complete secretome proteins identified..xlsx]

## Sheet: TableSupp
Group	Term	Overlap	Gene Ratio	P-value	Odds Ratio	Combined Score	Genes
Cell metabolism and lipid metabolism	gluconeogenesis (GO:0006094)	12/41	0.292683	1.7639e-09	9.72369	195.988	TPI1;GOT1;MDH1;MDH2;PGAM1;GOT2;PGK1;PGAM4;ALDOC;ENO1;ALDOA;GAPDH
	glucose metabolic process (GO:0006006)	14/64	0.21875	5.15589e-09	7.26744	138.686	TPI1;GOT1;MDH1;MDH2;PGAM1;GAA;GOT2;AKR1A1;ENO1;PGK1;PGAM4;ALDOC;ALDOA;GAPDH
	glycolytic process (GO:0006096)	7/23	0.304348	3.48197e-06	10.1112	127.077	LDHA;TPI1;PKM;PGAM1;PGK1;PGAM4;ALDOA
	ATP generation from ADP (GO:0006757)	7/24	0.291667	4.78855e-06	9.68992	118.695	LDHA;TPI1;PKM;PGAM1;PGK1;PGAM4;ALDOA
	glycogen metabolic process (GO:0005977)	7/33	0.212121	4.67082e-05	7.04722	70.272	UGP2;UBB;GAA;UBC;RPS27A;CALM1;UBA52
	ATPase activity (GO:0016887)	17/203	0.0837438	0.000146052	2.78219	24.571	NSF;MACF1;DYNC1I2;HSPA8;VCP;HSPA5;HSPA4;HSPA7;HSPA6;HSPA2;TOR1B;ATP5B;HSPH1;ACTC1;MYH9;ACIN1;CCT8
	positive regulation of ATP biosynthetic process (GO:2001171)	3/6	0.5	0.000507056	16.6113	126.028	VCP;TMSB4X;ENO1
	cellular response to oxidative stress (GO:0034599)	11/115	0.0956522	0.00070497	3.17781	23.0625	PDGFRA;PRDX1;TPM1;TXNL1;CYCS;PARK7;TXN;PTPRK;P4HB;SOD3;SOD1
	positive regulation of macromolecule biosynthetic process (GO:0010557)	11/142	0.0774648	0.00382814	2.57358	14.3229	PDGFRB;PDGFRA;MTPN;IL6;NPM1;HSPH1;IGF2;CALR;VIM;EEF2;THBS1
	lipoprotein particle binding (GO:0071813)	4/23	0.173913	0.00456315	5.77784	31.1411	PCSK9;CDH13;THBS1;LDLR
	Cholesterol metabolism	5/50	0.1	0.0168906	3.32226	13.5581	LRP1;NPC2;PCSK9;ANGPTL4;LDLR
	positive regulation of metabolic process (GO:0009893)	3/18	0.166667	0.0158075	5.5371	22.9639	ACLY;FASN;ACACA
	positive regulation of ATPase activity (GO:0032781)	4/35	0.114286	0.0203309	3.79687	14.7911	DYNC1I2;TMSB4X;TPM1;PFN1
	regulation of mitochondrial membrane potential (GO:0051881)	4/35	0.114286	0.0203309	3.79687	14.7911	VCP;UBB;PARK7;SOD1
	Fatty acid elongation	3/27	0.111111	0.0464685	3.6914	11.3288	ACOT2;ACOT1;HACD4
	Fatty acid biosynthesis	2/13	0.153846	0.0566556	5.11117	14.673	FASN;ACACA
	regulation of lipid metabolic process (GO:0019216)	7/100	0.07	0.0313434	2.32558	8.05291	NPC2;RARRES2;PSAP;ME1;ANGPTL4;AGT;CTGF
	positive regulation of lipid localization (GO:1905954)	2/10	0.2	0.0346795	6.64452	22.3363	C3;LRP1
	fatty acid derivative biosynthetic process (GO:1901570)	3/24	0.125	0.0343407	4.15282	14.0009	ACLY;FASN;ACACA
	glycolipid metabolic process (GO:0006664)	5/65	0.0769231	0.0458403	2.55558	7.87782	ARSA;ASAH1;HEXB;HEXA;PSAP
	very long-chain fatty acid metabolic process (GO:0000038)	3/29	0.103448	0.0555701	3.43682	9.93278	ACOT2;ACOT1;HACD4
	regulation of triglyceride biosynthetic process (GO:0010866)	2/13	0.153846	0.0566556	5.11117	14.673	C3;LDLR
	fatty-acyl-CoA biosynthetic process (GO:0046949)	3/30	0.1	0.0604149	3.32226	9.32398	ACLY;FASN;ACACA
	intracellular lipid transport (GO:0032365)	2/15	0.133333	0.0733351	4.42968	11.5735	NPC2;ACACA
	regulation of ATPase activity (GO:0043462)	3/40	0.075	0.118515	2.49169	5.31409	TPM2;TPM1;PFN1
	cholesterol transport (GO:0030301)	3/44	0.0681818	0.14591	2.26518	4.35994	NPC2;CLU;LDLR
	cellular response to lipid (GO:0071396)	8/178	0.0449438	0.16942	1.49315	2.6509	IL6;PABPN1;PTK7;AXL;SERPINE1;ADAM9;MSN;PDCD1LG2
	regulation of lipid transport (GO:0032368)	1/8	0.125	0.216936	4.15282	6.34614	LRP1
	lipoprotein transport (GO:0042953)	1/8	0.125	0.216936	4.15282	6.34614	LRP1
	fatty acid metabolic process (GO:0006631)	5/106	0.0471698	0.215084	1.5671	2.40821	ACLY;FASN;ACOT2;ACOT1;ACACA
	lipid transport (GO:0006869)	4/91	0.043956	0.293487	1.46033	1.79025	NPC2;PSAP;GOT2;LDLR
	positive regulation of cholesterol efflux (GO:0010875)	1/13	0.0769231	0.327955	2.55558	2.84916	LRP1
	very long-chain fatty acid biosynthetic process (GO:0042761)	1/13	0.0769231	0.327955	2.55558	2.84916	HACD4
	Drug metabolism	4/108	0.037037	0.409744	1.23047	1.09785	NME1-NME2;GSTO1;NME2;NME1
	positive regulation of mitochondrion organization (GO:0010822)	5/128	0.0390625	0.34186	1.29776	1.39295	PSMB7;PDCD5;PLAUR;PARK7;DCN
	fatty acid transport (GO:0015908)	1/14	0.0714286	0.348197	2.37304	2.50353	GOT2
	regulation of cholesterol metabolic process (GO:0090181)	2/41	0.0487805	0.351008	1.62061	1.6967	FASN;ACACA
	lipid particle organization (GO:0034389)	1/14	0.0714286	0.348197	2.37304	2.50353	PPIA
	phospholipid catabolic process (GO:0009395)	1/17	0.0588235	0.405342	1.95427	1.76475	ENPP2
	regulation of lipid catabolic process (GO:0050994)	1/17	0.0588235	0.405342	1.95427	1.76475	RARRES2
	Ether lipid metabolism	1/47	0.0212766	0.762623	0.706864	0.191554	ENPP2
	Non-alcoholic fatty liver disease (NAFLD)	2/149	0.0134228	0.941433	0.445941	0.0269135	IL6;CYCS
	ATPase regulator activity (GO:0060590)	2/38	0.0526316	0.317794	1.74856	2.00446	HSPH1;PFN1
	cholesterol transporter activity (GO:0017127)	1/17	0.0588235	0.405342	1.95427	1.76475	NPC2
	oxidoreductase activity, acting on the aldehyde or oxo group of donors, NAD or NADP as acceptor (GO:0016620)	1/25	0.04	0.534444	1.3289	0.832597	ALDH9A1
	phospholipase activity (GO:0004620)	2/69	0.0289855	0.619167	0.962974	0.46163	PDIA3;ENPP2
	regulation of lipoprotein lipase activity (GO:0051004)	1/20	0.05	0.457485	1.66113	1.29902	ANGPTL4
	long-chain fatty acid metabolic process (GO:0001676)	2/55	0.0363636	0.496252	1.20809	0.846477	ACOT2;ACOT1
	cellular lipid catabolic process (GO:0044242)	1/24	0.0416667	0.519978	1.38427	0.905273	ENPP2
	lipid biosynthetic process (GO:0008610)	2/72	0.0277778	0.642301	0.92285	0.408544	ACLY;ACACA
	glucose homeostasis (GO:0042593)	2/74	0.027027	0.657098	0.897908	0.377051	IGF2;PARK7
	inner mitochondrial membrane organization (GO:0007007)	1/36	0.0277778	0.667534	0.92285	0.372983	ATP5B
	regulation of ATP metabolic process (GO:1903578)	1/43	0.0232558	0.731681	0.772618	0.241374	PGAM1
	mitochondrion organization (GO:0007005)	4/167	0.0239521	0.744169	0.795751	0.235134	ATP5B;GLUD1;CYCS;PARK7
Cytokines and immune response	neutrophil mediated immunity (GO:0002446)	69/487	0.141684	2.66011e-27	4.7071	288.034	HSP90AB1;HEXB;CTSZ;GDI2;APEH;SIRPB1;PNP;TIMP2;COTL1;SIRPA;QSOX1;B2M;SPTAN1;CTSB;CAP1;ACTR2;ARSA;MANBA;DBNL;ANXA2;PGAM1;GAA;NME2;PLAUR;PSMA5;ACLY;PKM;PSMA2;NPC2;ALDOC;ALDOA;PPIA;CD44;VCL;CFD;CSTB;ASAH1;GRN;VCP;CANT1;MVP;PRCP;GNS;C3;CST3;PSMB7;SDCBP;PRDX4;PSAP;LTA4H;CCT8;TXNDC5;VAT1;HSPA8;GSN;IDH1;FUCA2;HSPA6;PDAP1;ARPC5;EEF2;CPPED1;IGF2R;ERP44;NFASC;IL6;FABP5;PTX3;NIT2
	cytokine-mediated signaling pathway (GO:0019221)	56/633	0.0884676	5.17312e-13	2.93912	83.1482	ITGB1;CSF1;EDA2R;PSMD9;MT2A;TMSB4X;CFL1;TIMP1;B2M;ANXA2;GSTO1;MMP1;MMP2;BGN;HLA-B;TALDO1;HLA-C;HLA-A;YWHAZ;DCN;PSMA5;PSMA6;PSMA3;PSMA4;PSMA1;PSMA2;TCP1;BOLA2;FSCN1;UBE2V1;UBA52;PPIA;CD44;LRRC15;HSP90B1;PSMB6;PSMB7;PSMB4;PSMB5;UBB;UBC;RPS27A;HSPA8;FN1;MSN;VEGFA;SOD1;IL6;COL1A2;CAPZA1;HNRNPA2B1;UBE2N;P4HB;VIM;BRWD1;CRLF1
	interleukin-12-mediated signaling pathway (GO:0035722)	12/46	0.26087	7.57283e-09	8.66676	162.057	ANXA2;GSTO1;CAPZA1;CFL1;BOLA2;TCP1;HNRNPA2B1;MSN;TALDO1;P4HB;PPIA;SOD1
	tumor necrosis factor-mediated signaling pathway (GO:0033209)	17/123	0.138211	1.68395e-07	4.59174	71.6171	EDA2R;PSMA5;PSMB6;PSMD9;PSMA6;PSMB7;PSMA3;PSMB4;PSMA4;PSMB5;UBB;PSMA1;PSMA2;TMSB4X;UBC;RPS27A;UBA52
	cellular response to tumor necrosis factor (GO:0071356)	18/194	0.0927835	2.45191e-05	3.08251	32.7241	ADAMTS12;EDA2R;PSMA5;PSMB6;PSMD9;PSMA6;PSMB7;PSMA3;PSMB4;PSMA4;PSMB5;PSMA1;UBB;PSMA2;TMSB4X;UBC;RPS27A;UBA52
	positive regulation of NF-kappaB transcription factor activity (GO:0051092)	14/128	0.109375	3.20025e-05	3.63372	37.6079	APP;MTPN;NPM1;CLU;EDA2R;AGT;MTDH;PSMA6;UBB;UBC;UBE2N;UBE2V1;RPS27A;UBA52
	Leukocyte transendothelial migration	11/112	0.0982143	0.000563694	3.26293	24.41	ITGB1;ACTN1;MMP2;MSN;ACTN4;EZR;VCL;MYL12A;CD99;ACTG1;MYL12B
	cellular response to cytokine stimulus (GO:0071345)	27/456	0.0592105	0.000698172	1.96713	14.2952	ITGB1;LRRC15;CSF1;MT1X;ADAMTS12;HSP90B1;MT2A;UBB;UBC;TIMP1;RPS27A;HSPA8;MMP1;MMP2;FN1;BGN;YWHAZ;DCN;VEGFA;IL6;COL1A2;AXL;FSCN1;VIM;UBA52;GAPDH;CRLF1
	monocyte activation (GO:0042117)	3/8	0.375	0.00135702	12.4585	82.2566	CSF1;MT1G;ADAM9
	positive regulation of leukocyte chemotaxis (GO:0002690)	7/61	0.114754	0.00230735	3.81243	23.1477	IL6;CSF1;RARRES2;SERPINE1;CALR;THBS1;VEGFA
	regulation of acute inflammatory response (GO:0002673)	10/121	0.0826446	0.00360526	2.74567	15.4454	C4B;C3;C4A;IL6;CFH;C1S;C1R;SERPING1;CLU;CFB
	regulation of mononuclear cell migration (GO:0071675)	3/12	0.25	0.00487241	8.30565	44.2207	CSF1;RARRES2;THBS1
	regulation of humoral immune response (GO:0002920)	9/113	0.079646	0.00713277	2.64605	13.0796	C4B;C3;C4A;CFH;C1S;C1R;SERPING1;CLU;CFB
	MyD88-independent toll-like receptor signaling pathway (GO:0002756)	4/30	0.133333	0.0119673	4.42968	19.6039	UBB;UBC;RPS27A;UBA52
	regulation of cytokine production (GO:0001817)	8/108	0.0740741	0.0163482	2.46093	10.1234	TWSG1;IL6;UBB;UBC;RPS27A;UBA52;AGT;SOD1
	positive regulation of T cell activation (GO:0050870)	6/68	0.0882353	0.0164161	2.93141	12.0466	IL6;PNP;TFRC;SIRPA;PDCD1LG2;SIRPB1
	regulation of monocyte chemotaxis (GO:0090025)	3/22	0.136364	0.0273052	4.53035	16.3123	GREM1;NOV;SERPINE1
	regulation of inflammatory response (GO:0050727)	10/166	0.060241	0.0289429	2.00136	7.08969	C1QTNF3;PSMA6;SEMA7A;NOV;TMSB4X;SERPINE1;PARK7;METRNL;ADAMTS12;AGT
	positive regulation of T cell proliferation (GO:0042102)	5/61	0.0819672	0.0363454	2.72316	9.02643	IL6;PNP;TFRC;IGF2;PDCD1LG2
	regulation of cellular response to stress (GO:0080135)	7/104	0.0673077	0.037615	2.23614	7.33532	YWHAE;HSPA8;NPM1;HSPH1;HSP90AB1;FKBP4;CRYAB
	regulation of immune response (GO:0050776)	13/251	0.0517928	0.0411438	1.72069	5.49018	ITGB1;ERAP1;HLA-B;HLA-C;HLA-A;PVR;C3;COL1A1;FKBP1A;COL3A1;COL1A2;B2M;CD99
	positive regulation of T cell cytokine production (GO:0002726)	2/12	0.166667	0.0488922	5.5371	16.7117	IL6;B2M
	negative regulation of chemokine production (GO:0032682)	2/13	0.153846	0.0566556	5.11117	14.673	C1QTNF3;IL6
	regulation of leukocyte migration (GO:0002685)	2/13	0.153846	0.0566556	5.11117	14.673	MSN;VEGFA
	positive regulation of acute inflammatory response (GO:0002675)	2/15	0.133333	0.0733351	4.42968	11.5735	IL6;PARK7
	regulation of T cell proliferation (GO:0042129)	4/62	0.0645161	0.116338	2.14339	4.61099	IL6;PNP;TFRC;PDCD1LG2
	regulation of release of cytochrome c from mitochondria (GO:0090199)	3/40	0.075	0.118515	2.49169	5.31409	PDCD5;PLAUR;CLU
	negative regulation of innate immune response (GO:0045824)	2/20	0.1	0.120426	3.32226	7.03229	SERPING1;A2M
	regulation of T cell activation (GO:0050863)	3/44	0.0681818	0.14591	2.26518	4.35994	GSN;SIRPA;SIRPB1
	regulation of T-helper 2 cell cytokine production (GO:2000551)	1/8	0.125	0.216936	4.15282	6.34614	IL6
	negative regulation of inflammatory response (GO:0050728)	4/78	0.0512821	0.208072	1.70372	2.67462	CHID1;C1QTNF3;NOV;METRNL
	positive regulation of cytokine production (GO:0001819)	9/220	0.0409091	0.219563	1.35911	2.06056	C3;C1QTNF3;IL6;SERPINE1;PARK7;LRRFIP1;GAPDH;AGT;SOD1
	IL-17 signaling pathway	4/93	0.0430108	0.307078	1.42893	1.68707	IL6;HSP90AB1;MMP1;HSP90B1
	T-helper cell lineage commitment (GO:0002295)	1/8	0.125	0.216936	4.15282	6.34614	IL6
	T-helper 17 cell differentiation (GO:0072539)	1/8	0.125	0.216936	4.15282	6.34614	IL6
	positive regulation of leukocyte migration (GO:0002687)	2/34	0.0588235	0.27295	1.95427	2.53755	IL6;VEGFA
	regulation of interleukin-8 production (GO:0032677)	2/34	0.0588235	0.27295	1.95427	2.53755	SERPINE1;PARK7
	T cell proliferation (GO:0042098)	1/11	0.0909091	0.28557	3.02024	3.78517	MSN
	regulation of T cell cytokine production (GO:0002724)	1/13	0.0769231	0.327955	2.55558	2.84916	B2M
	leukocyte differentiation (GO:0002521)	1/13	0.0769231	0.327955	2.55558	2.84916	AXL
	interleukin-6-mediated signaling pathway (GO:0070102)	1/14	0.0714286	0.348197	2.37304	2.50353	IL6
	regulation of innate immune response (GO:0045088)	3/69	0.0434783	0.344449	1.44446	1.53952	HSP90AB1;CDC37;ERAP1
	positive regulation of cytokine production involved in immune response (GO:0002720)	1/15	0.0666667	0.36783	2.21484	2.21514	B2M
	positive regulation of cytokine secretion (GO:0050715)	3/73	0.0410959	0.37744	1.36531	1.33028	C1QTNF3;GAPDH;SPTBN1
	positive regulation of leukocyte activation (GO:0002696)	1/16	0.0625	0.386872	2.07641	1.97189	THBS1
	positive regulation of inflammatory response (GO:0050729)	3/73	0.0410959	0.37744	1.36531	1.33028	IL6;SERPINE1;AGT
	positive regulation of G1/S transition of mitotic cell cycle (GO:1900087)	1/16	0.0625	0.386872	2.07641	1.97189	RDX
	T cell migration (GO:0072678)	1/16	0.0625	0.386872	2.07641	1.97189	MSN
	leukocyte tethering or rolling (GO:0050901)	1/16	0.0625	0.386872	2.07641	1.97189	ITGB1
	regulation of T cell migration (GO:2000404)	1/17	0.0588235	0.405342	1.95427	1.76475	APP
	positive regulation of monocyte chemotaxis (GO:0090026)	1/17	0.0588235	0.405342	1.95427	1.76475	SERPINE1
	TNF signaling pathway	2/110	0.0181818	0.847729	0.604047	0.0997851	IL6;CSF1
	Th1 and Th2 cell differentiation	1/92	0.0108696	0.940288	0.361115	0.0222336	NOTCH3
	positive regulation of lymphocyte activation (GO:0051251)	3/104	0.0288462	0.609705	0.958344	0.47417	IL6;SIRPA;SIRPB1
	positive regulation of tumor necrosis factor superfamily cytokine production (GO:1903557)	1/32	0.03125	0.624224	1.03821	0.48925	CLU
	regulation of interleukin-12 production (GO:0032655)	1/33	0.030303	0.635553	1.00675	0.456317	THBS1
	negative regulation of T cell activation (GO:0050868)	1/34	0.0294118	0.646541	0.977135	0.426147	PDCD1LG2
	positive regulation of chemokine production (GO:0032722)	1/34	0.0294118	0.646541	0.977135	0.426147	IL6
	lymphocyte proliferation (GO:0046651)	1/36	0.0277778	0.667534	0.92285	0.372983	MSN
	negative regulation of immune system process (GO:0002683)	1/44	0.0227273	0.739775	0.755059	0.227582	COL3A1
	cytokine activity (GO:0005125)	7/155	0.0451613	0.187219	1.50038	2.51384	IL6;CSF1;FAM3C;INHBA;TIMP1;CRLF1;VEGFA
	tumor necrosis factor-activated receptor activity (GO:0005031)	1/24	0.0416667	0.519978	1.38427	0.905273	EDA2R
Growth factors and organization of extracellular matrix	extracellular matrix organization (GO:0030198)	64/229	0.279476	8.22786e-44	9.28492	921.121	ITGB1;APP;SPARC;COL16A1;SERPINE1;COL12A1;TNC;LOXL3;LAMC1;HAPLN1;LOXL2;COMP;CTSL;TIMP2;TIMP1;POSTN;VWF;MMP1;MMP2;BGN;HSPG2;DCN;GREM1;VCAN;COL4A2;LOX;COL4A1;COL6A2;PXDN;COL6A1;COL6A3;CD44;FBN2;LAMA2;LAMA1;COL11A1;LAMA4;HTRA1;NDNF;NID1;NID2;THBS1;FBLN5;SCUBE3;ACAN;SERPINH1;A2M;LUM;LAMB2;FN1;LAMB1;COL1A1;MFAP5;COL3A1;COL1A2;BMP1;COL5A1;COL5A3;COL7A1;COL5A2;MFAP2;AGRN;RECK;FBN1
	regulation of angiogenesis (GO:0045765)	18/177	0.101695	6.96395e-06	3.37857	40.1197	ITGB1;ECM1;SPARC;SERPINF1;SERPINE1;HSPB1;THBS2;HSPG2;THBS1;DCN;MTDH;FAM129B;VEGFA;MYDGF;IL6;COL4A2;PGK1;ANGPTL4
	regulation of transforming growth factor beta receptor signaling pathway (GO:0017015)	11/79	0.139241	2.36956e-05	4.62593	49.2672	SDCBP;HSP90AB1;UBB;CD109;UBC;RPS27A;UBA52;THBS1;VASN;DKK3;ENG
	positive regulation of epidermal growth factor receptor signaling pathway (GO:0045742)	6/29	0.206897	0.000190781	6.87364	58.8685	UBB;UBC;PLAUR;RPS27A;UBA52;AGT
	insulin-like growth factor binding (GO:0005520)	4/14	0.285714	0.000639427	9.49217	69.8143	IGFBP5;IGFBP4;IGFBP3;IGFBP6
	growth factor activity (GO:0008083)	8/69	0.115942	0.00106929	3.85189	26.3499	GRN;IL6;CSF1;CLEC11A;IGF2;INHBA;AGT;VEGFA
	ATF6-mediated unfolded protein response (GO:0036500)	3/9	0.333333	0.00199014	11.0742	68.8765	HSPA5;CALR;HSP90B1
	vascular endothelial growth factor signaling pathway (GO:0038084)	2/7	0.285714	0.017179	9.49217	38.5768	NRP1;VEGFA
	TGF-beta signaling pathway	6/90	0.0666667	0.0542137	2.21484	6.45586	INHBA;FMOD;NEO1;THBS1;LTBP1;DCN
	hepatocyte growth factor receptor signaling pathway (GO:0048012)	2/11	0.181818	0.0415556	6.04047	19.2131	NRP1;STMN1
	vascular endothelial growth factor receptor binding (GO:0005172)	2/9	0.222222	0.0282996	7.3828	26.319	GREM1;VEGFA
	cellular response to fibroblast growth factor stimulus (GO:0044344)	6/94	0.0638298	0.0642894	2.12059	5.81967	UBB;UBC;RPS27A;HNRNPA1;UBA52;CD44
	vasculature development (GO:0001944)	2/15	0.133333	0.0733351	4.42968	11.5735	PDGFRB;PDGFRA
	VEGF signaling pathway	2/59	0.0338983	0.533856	1.12619	0.706828	HSPB1;VEGFA
	BMP signaling pathway (GO:0030509)	2/81	0.0246914	0.705046	0.820311	0.286692	FSTL1;ENG
	epidermal growth factor receptor binding (GO:0005154)	1/25	0.04	0.534444	1.3289	0.832597	EFEMP1
Factors related to the cell cycle and proliferation	regulation of G2/M transition of mitotic cell cycle (GO:0010389)	21/149	0.14094	4.21051e-09	4.68238	90.3029	YWHAE;DYNC1I2;DCTN2;RAB11A;PSMA5;PSMB6;PSMD9;PSMA6;PSMB7;PSMA3;PSMB4;TUBA1A;PSMA4;PSMB5;UBB;PSMA1;PSMA2;UBC;RPS27A;UBA52;YWHAG
	negative regulation of apoptotic process (GO:0043066)	40/485	0.0824742	9.27177e-09	2.74001	50.68	ITGB1;YWHAE;HSPB1;NDNF;PARK7;THBS1;MTDH;FAM129B;HSP90B1;COMP;MYDGF;UBB;ARHGDIA;CFL1;UBC;FLNA;RPS27A;TXNDC5;PDGFRB;EPHA4;PDGFRA;NPM1;HSPA5;IGF2;NME2;PLAUR;YWHAZ;VEGFA;SOD1;GREM1;IL6;AXL;DDAH2;ANGPTL4;UBA52;CRYAB;CRLF1;TPT1;CD44;LGMN
	regulation of mitotic cell cycle phase transition (GO:1901990)	21/184	0.11413	1.77548e-07	3.79171	58.9384	YWHAE;DYNC1I2;DCTN2;DDB1;PSMA5;PSMB6;PSMD9;PSMA6;PSMB7;PSMA3;PSMB4;TUBA1A;PSMA4;PSMB5;UBB;PSMA1;PSMA2;UBC;RPS27A;UBA52;YWHAG
	regulation of apoptotic process (GO:0042981)	51/815	0.0625767	6.85861e-07	2.07896	29.5058	ITGB1;PDCD5;PCSK9;HSPB1;PARK7;CLU;COMP;MYDGF;LGALS1;ARHGDIA;CFL1;NME2P1;CTSB;PDGFRB;EPHA4;PDGFRA;IGFBP3;ACTN1;NME2;PLAUR;ACTN4;YWHAZ;NME1;GREM1;DDAH2;ANGPTL4;UBA52;CRYAB;CD44;VCP;THBS1;RTN4;MTDH;FAM129B;HSP90B1;UBB;UBC;FLNA;RPS27A;TXNDC5;NPM1;HSPA5;IGF2;INHBA;VEGFA;SOD1;IL6;AXL;APEX1;CALR;TPT1
	regulation of necrotic cell death (GO:0010939)	4/13	0.307692	0.000467824	10.2223	78.3789	UBB;UBC;RPS27A;UBA52
	positive regulation of cell proliferation (GO:0008284)	26/424	0.0613208	0.000519968	2.03723	15.405	CSF1;LAMC1;THBS1;CYR61;SDCBP;PDGFD;TIMP1;PDGFRB;PDGFRA;NPM1;CNBP;CLEC11A;FN1;IGF2;NME2;LAMB1;AGT;NME1;VEGFA;GREM1;IL6;MDM2;TMEM119;CDH13;CALR;CRLF1
	nitric oxide mediated signal transduction (GO:0007263)	4/15	0.266667	0.000851295	8.85936	62.6246	DDAH1;DDAH2;NDNF;AGT
	Apoptosis	11/143	0.0769231	0.00403783	2.55558	14.0865	TUBA1C;TUBA3E;TUBA1B;TUBA1A;CTSL;CTSZ;LMNA;CYCS;SPTAN1;ACTG1;CTSB
	negative regulation of intrinsic apoptotic signaling pathway (GO:2001243)	7/62	0.112903	0.00253489	3.75094	22.4216	PLAUR;MDM2;HSPB1;PARK7;ENO1;CLU;TPT1
	G2/M transition of mitotic cell cycle (GO:0000086)	10/126	0.0793651	0.00480801	2.63671	14.0734	YWHAE;DYNC1I2;TUBA1A;PPP1R12A;UBB;DCTN2;UBC;RPS27A;UBA52;YWHAG
	cell cycle G2/M phase transition (GO:0044839)	10/127	0.0787402	0.00508252	2.61595	13.8173	YWHAE;DYNC1I2;TUBA1A;PPP1R12A;UBB;DCTN2;UBC;RPS27A;UBA52;YWHAG
	regulation of cell proliferation (GO:0042127)	33/740	0.0445946	0.0163138	1.48155	6.09767	APP;CSF1;PDCD5;PTPRK;THBS1;FAM129B;SDCBP;RBBP4;PDGFD;LMNA;IGFBP7;TIMP1;IGFBP6;PDGFRB;PDGFRA;NPM1;IGFBP3;CNBP;CLEC11A;FN1;IGF2;HMGA1;INHBA;AGT;NME1;VEGFA;GREM1;IL6;DDAH1;MDM2;CDH13;CALR;CRLF1
	regulation of cell cycle G2/M phase transition (GO:1902749)	6/84	0.0714286	0.0410138	2.37304	7.57913	YWHAE;DYNC1I2;NPM1;TUBA1A;DCTN2;YWHAG
	Cell cycle	7/124	0.0564516	0.0809387	1.87547	4.71505	YWHAE;YWHAQ;YWHAB;MDM2;YWHAZ;YWHAG;YWHAH
	negative regulation of transcription, DNA-templated (GO:0045892)	29/813	0.0356704	0.196677	1.18506	1.92714	LOXL3;ENO1;AEBP1;PTPRK;PPM1F;MTDH;FAM129B;LOXL2;TRIM28;UBB;YWHAQ;BASP1;UBC;FLNA;LRRFIP1;RPS27A;HIST1H1B;HSPA8;CBX3;CNBP;IGF2;HMGA1;DKK3;VEGFA;DAP;MDM2;CALR;EZR;UBA52
	negative regulation of release of cytochrome c from mitochondria (GO:0090201)	1/15	0.0666667	0.36783	2.21484	2.21514	CLU
	Necroptosis	5/162	0.0308642	0.540557	1.02539	0.630774	GLUD1;GLUD2;HSP90AB1;GLUL;PPIA
	cellular response to interleukin-6 (GO:0071354)	1/23	0.0434783	0.505063	1.44446	0.986671	IL6
	liver development (GO:0001889)	1/31	0.0322581	0.612544	1.0717	0.525276	PCSK9
	positive regulation of cell cycle process (GO:0090068)	3/107	0.0280374	0.628934	0.931475	0.431952	PDGFRB;FAP;IGF2
	response to tumor necrosis factor (GO:0034612)	2/97	0.0206186	0.793858	0.685002	0.158133	ADAM9;ADAMTS12
